# Supplementary material for: Magnetoencephalogram Network Analysis of Depression Based on Polynomial Kernel Granger Causality
Source: Preprints.org preprint supplement (doi:10.20944/preprints202308.0695.v1), 2023-08-09

**南京医科大学附属脑科医院  
医院医学伦理委员会临床医学研究审查批件**

批件号: 2017-KY015

|                                                                                                                                                                                                                                                                                                                                                                                      |                                                                                                                                                                                    |      |             |        |                  |
|--------------------------------------------------------------------------------------------------------------------------------------------------------------------------------------------------------------------------------------------------------------------------------------------------------------------------------------------------------------------------------------|------------------------------------------------------------------------------------------------------------------------------------------------------------------------------------|------|-------------|--------|------------------|
| 审查类别                                                                                                                                                                                                                                                                                                                                                                                 | 初始审查                                                                                                                                                                               | 审查时间 | 2017. 2. 22 | 审查会议地点 | 3号楼5楼会议室         |
| 项目负责人                                                                                                                                                                                                                                                                                                                                                                                | 谢世平 王俊<br>闫伟                                                                                                                                                                       | 审查方式 | 会议审查        | 研究时间   | 2018. 1-2021. 12 |
| 研究项目名称                                                                                                                                                                                                                                                                                                                                                                               | 基于基因组、连接组学生物标记的精神分裂症疗效预测模型研究                                                                                                                                                       |      |             |        |                  |
| 项目承担单位                                                                                                                                                                                                                                                                                                                                                                               | 南京医科大学附属脑科医院    南京邮电大学                                                                                                                                                             |      |             |        |                  |
| 涉及人体<br>研究单位                                                                                                                                                                                                                                                                                                                                                                         | 南京医科大学附属脑科医院                                                                                                                                                                       |      |             |        |                  |
| 审查文件                                                                                                                                                                                                                                                                                                                                                                                 | 1、申报书<br>2、知情同意书                                                                                                                                                                   |      |             |        |                  |
| 审查委员                                                                                                                                                                                                                                                                                                                                                                                 | 应到: 11 人      实到: 8 人      回避: 0 人                                                                                                                                                 |      |             |        |                  |
| 审批结论                                                                                                                                                                                                                                                                                                                                                                                 | <input type="checkbox"/> 同意 <input checked="" type="checkbox"/> 作必要修改后同意<br><input type="checkbox"/> 作必要修改后重审 <input type="checkbox"/> 不同意<br><input type="checkbox"/> 终止或暂停已批准的试验 |      |             |        |                  |
| 审查意见                                                                                                                                                                                                                                                                                                                                                                                 | 同意申报。                                                                                                                                                                              |      |             |        |                  |
| <b>注意: (请仔细阅读)</b><br>1. 已批准项目须遵循本伦理委员会批准的方案执行, 须符合《赫尔辛基宣言》的原则。<br>2. 暂停/提前终止临床研究, 请及时通知伦理委员会。<br>3. 发生严重不良事件及影响研究风险受益比的非预期事件, 须及时报告本伦理委员会。<br>4. 对已批准的临床研究方案、知情同意书等材料的任何修改及主要研究者更换等, 须及时通知本伦理委员会重新审查, 获得批准后执行。<br>5. 发现违反方案的情况须及时报告本伦理委员会。<br>6. 根据伦理委员会对跟踪审查频度的意见, 确定跟踪审查周期为 <u>不适用</u> , 请在跟踪审查日期到期前一个月提交研究进展报告。批件有效期为研究截止日, 超过有效期, 请通过研究进展报告提出申请。<br>7. 完成临床研究, 须提交结题报告供伦理委员会审查。 |                                                                                                                                                                                    |      |             |        |                  |
| 伦理委员会主席 (或被授权者) 姓名: 刘宏毅<br>伦理委员会主席 (或被授权者) 签名: <br>伦理委员会公章: <br>审批日期: 2017.2.28                                                                                                                             |                                                                                                                                                                                    |      |             |        |                  |

伦理委员会名称：南京脑科医院伦理委员会

地址：南京市广州路264号，邮编：210029

联系人：时影，联系电话：025-82296083

#### 伦理委员会声明

本伦理委员会的职责、人员组成、操作程序及记录遵循ICH-GCP、中国的相关法律和法规。

**This ethics committee's responsibilities, composition, function, operations and records are fully compliant with ICH-GCP, and related regulation and law of China.**

| 伦理委员会委员名单 |    |               |       |       |     |
|-----------|----|---------------|-------|-------|-----|
| 姓名        | 性别 | 工作单位          | 职称    | 备注    | 签字  |
| 刘宏毅       | 男  | 南京脑科医院        | 主任医师  | 主任委员  | 刘宏毅 |
| 钱群        | 男  | 南京脑科医院        | 高级政工师 | 副主任委员 | 缺席  |
| 陈亚新       | 女  | 南京医科大学        | 教授    | 副主任委员 | 缺席  |
| 肖红        | 女  | 南京脑科医院        | 主任药师  | 副主任委员 | 肖红  |
| 刘三源       | 男  | 南京脑科医院        | 主任医师  | 委员    | 刘三源 |
| 朱含涌       | 男  | 南京脑科医院        | 副主任药师 | 委员    | 朱含涌 |
| 李越        | 女  | 南京脑科医院        | 高级政工师 | 委员    | 李越  |
| 孙丰        | 男  | 南京脑科医院        | 副主任医师 | 委员    | 孙丰  |
| 陈正山       | 男  | 北京大成(南京)律师事务所 | 律师    | 委员    | 缺席  |
| 孙建春       | 男  | 江苏省农业委员会      | 调研员   | 委员    | 孙建春 |
| 尤佳        | 男  | 江苏兢慎律师事务所     | 律师    | 委员    | 尤佳  |

本伦理委员会委员名单自2014年12月16日起生效。

伦理委员会公章：

日期：2017.2.22

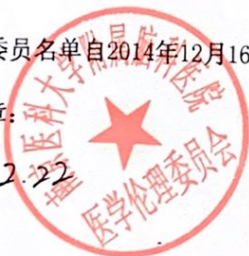

Supplement: Supplementary file 1 [file supplementary]
